# Supplementary material for: Hybrid Multi-Criteria Decision-Making Approach to Choose the Best Treatment Process to Remove Pesticides from Drinking Water Sources: Diuron and Cypermethrin
Source: Research Square preprint supplement (doi:10.21203/rs.3.rs-1886636/v1), 2023-03-28
Supplement: Supplementary file 1 [file 1de5509dcc30b91856d8dcdb.docx]

| **Summary**  Although there are many studies on the effects of pesticides used in agricultural activities on the environment and human health, the exact results are not known exactly. Therefore, these pollutants must be completely removed from the environment. Unfortunately, the design of drinking water treatment plants is not successful in removing pesticides. Therefore, modernization of existing conventional facilities is necessary. However, it is not clear which treatment technology will be used in this modernization process, how these treatment technologies will be determined and what the criteria will be. In this study, diuron and cypermethrin were selected as sample pollutants and treatment alternatives used in literature research were determined. Multi criteria decision-making methods such as TOPSIS and VIKOR will be used to determine the best treatment alternative. In this context, it is aimed to reflect the opinions of experts on water and wastewater treatment to the study. The answers to the questions below will be used to determine the weight scores of the evaluation criteria and the weights of each treatment alternative according to the evaluation criteria.  Thank you for your support, participation and sharing your valuable comments on this study.  Kind regards. |
| --- |

**Table A.1** Thomas L. Saaty's Scale of Relative Significance Table

| Intensity of Relative Importance | Definition | Explanation |
| --- | --- | --- |
| 1 | Equal Importance | Two activities contribute equally to the objective |
| 3 | Moderate importance of one over another | Experience and judgment slightly favour one activity over another |
| 5 | Essential or strong importance | Experience and judgment strongly favour one activity over another |
| 7 | Demonstrated importance | An activity is strongly favoured, and its dominance is demonstrated in practice |
| 9 | Absolute importance | The highest possible order of affirmation |
| 2, 4, 6, 8 | Intermediate values between the two adjacent judgments | When compromise is needed |

**Table A.2** Pairwise comparison of criteria

| **Criteria** | **C1** | **C2** | **C3** | **C4** | **C5** | **C6** | **C7** | **C8** | **C9** | **C10** | **C11** | **C12** | **C13** | **C14** |
| --- | --- | --- | --- | --- | --- | --- | --- | --- | --- | --- | --- | --- | --- | --- |
| C1 | **1.00** | 3.00 | 3.00 | 3.00 | 3.00 | 3.00 | 3.00 | 3.00 | 2.00 | 2.00 | 0.20 | 2.00 | 2.00 | 1.00 |
| C2 | 0.33 | **1.00** | 6.00 | 6.00 | 5.00 | 3.00 | 3.00 | 3.00 | 3.00 | 2.00 | 1.00 | 1.00 | 1.00 | 1.00 |
| C3 | 0.33 | 0.16 | **1.00** | 3.00 | 3.00 | 0.20 | 0.33 | 0.14 | 0.14 | 0.33 | 0.20 | 0.33 | 0.20 | 0.11 |
| C4 | 0.33 | 0.16 | 0.33 | **1.00** | 0.33 | 0.20 | 0.20 | 0.20 | 0.20 | 0.14 | 0.14 | 0.20 | 0.20 | 0.20 |
| C5 | 0.33 | 0.20 | 0.33 | 3.00 | **1.00** | 0.20 | 0.33 | 0.33 | 0.33 | 0.20 | 0.20 | 0.20 | 0.20 | 0.14 |
| C6 | 0.33 | 0.33 | 5.00 | 5.00 | 5.00 | **1.00** | 1.00 | 1.00 | 1.00 | 2.00 | 0.33 | 0.33 | 2.00 | 0.20 |
| C7 | 0.33 | 0.33 | 3.00 | 5.00 | 3.00 | 1.00 | **1.00** | 1.00 | 1.00 | 1.00 | 0.11 | 0.33 | 0.33 | 0.20 |
| C8 | 0.33 | 0.33 | 7.00 | 5.00 | 3.00 | 1.00 | 1.00 | **1.00** | 1.00 | 0.33 | 0.20 | 0.20 | 0.33 | 0.20 |
| C9 | 0.50 | 0.33 | 7.00 | 5.00 | 3.00 | 1.00 | 1.00 | 1.00 | **1.00** | 0.33 | 0.20 | 0.33 | 0.33 | 0.20 |
| C10 | 0.50 | 0.50 | 3.00 | 7.00 | 5.00 | 0.50 | 1.00 | 3.00 | 3.00 | **1.00** | 0.33 | 0.20 | 1.00 | 0.20 |
| C11 | 5.00 | 1.00 | 5.00 | 7.00 | 5.00 | 3.00 | 9.00 | 5.00 | 5.00 | 3.00 | **1.00** | 2.00 | 2.00 | 1.00 |
| C12 | 0.50 | 1.00 | 3.00 | 5.00 | 5.00 | 3.00 | 3.00 | 5.00 | 3.00 | 5.00 | 0.50 | **1.00** | 1.00 | 0.33 |
| C13 | 0.50 | 1.00 | 5.00 | 5.00 | 5.00 | 0.50 | 3.00 | 3.00 | 3.03 | 1.00 | 0.50 | 1.00 | **1.00** | 0.33 |
| C14 | 1.00 | 1.00 | 9.00 | 5.00 | 7.00 | 5.00 | 5.00 | 5.00 | 5.00 | 5.00 | 1.00 | 3.00 | 3.00 | **1.00** |
| Total | 11.3 | 10.4 | 57.8 | 65.0 | 53.6 | 22.7 | 32.0 | 31.7 | 28.7 | 23.4 | 5.9 | 12.1 | 14.6 | 6.1 |

**Table A.3** Normalized pairwise comparison matrix

| **Criteria** | **C1** | **C2** | **C3** | **C4** | **C5** | **C6** | **C7** | **C8** | **C9** | **C10** | **C11** | **C12** | **C13** | **C14** |
| --- | --- | --- | --- | --- | --- | --- | --- | --- | --- | --- | --- | --- | --- | --- |
| C1 | 0.09 | 0.29 | 0.05 | 0.05 | 0.06 | 0.13 | 0.09 | 0.09 | 0.07 | 0.09 | 0.03 | 0.16 | 0.14 | 0.16 |
| C2 | 0.03 | 0.10 | 0.10 | 0.09 | 0.09 | 0.13 | 0.09 | 0.09 | 0.10 | 0.09 | 0.17 | 0.08 | 0.07 | 0.16 |
| C3 | 0.03 | 0.02 | 0.02 | 0.05 | 0.06 | 0.01 | 0.01 | 0.00 | 0.00 | 0.01 | 0.03 | 0.03 | 0.01 | 0.02 |
| C4 | 0.03 | 0.02 | 0.01 | 0.02 | 0.01 | 0.01 | 0.01 | 0.01 | 0.01 | 0.01 | 0.02 | 0.02 | 0.01 | 0.03 |
| C5 | 0.03 | 0.02 | 0.01 | 0.05 | 0.02 | 0.01 | 0.01 | 0.01 | 0.01 | 0.01 | 0.03 | 0.02 | 0.01 | 0.02 |
| C6 | 0.03 | 0.03 | 0.09 | 0.08 | 0.09 | 0.04 | 0.03 | 0.03 | 0.03 | 0.09 | 0.06 | 0.03 | 0.14 | 0.03 |
| C7 | 0.03 | 0.03 | 0.05 | 0.08 | 0.06 | 0.04 | 0.03 | 0.03 | 0.03 | 0.04 | 0.02 | 0.03 | 0.02 | 0.03 |
| C8 | 0.03 | 0.03 | 0.12 | 0.08 | 0.06 | 0.04 | 0.03 | 0.03 | 0.03 | 0.01 | 0.03 | 0.02 | 0.02 | 0.03 |
| C9 | 0.04 | 0.03 | 0.12 | 0.08 | 0.06 | 0.04 | 0.03 | 0.03 | 0.03 | 0.01 | 0.03 | 0.03 | 0.02 | 0.03 |
| C10 | 0.04 | 0.05 | 0.05 | 0.11 | 0.09 | 0.02 | 0.03 | 0.09 | 0.11 | 0.04 | 0.06 | 0.02 | 0.07 | 0.03 |
| C11 | 0.44 | 0.10 | 0.09 | 0.11 | 0.09 | 0.13 | 0.28 | 0.16 | 0.17 | 0.13 | 0.17 | 0.16 | 0.14 | 0.16 |
| C12 | 0.04 | 0.10 | 0.05 | 0.08 | 0.09 | 0.13 | 0.09 | 0.16 | 0.10 | 0.21 | 0.08 | 0.08 | 0.07 | 0.05 |
| C13 | 0.04 | 0.10 | 0.09 | 0.08 | 0.09 | 0.02 | 0.09 | 0.09 | 0.11 | 0.04 | 0.08 | 0.08 | 0.07 | 0.05 |
| C14 | 0.09 | 0.10 | 0.16 | 0.08 | 0.13 | 0.22 | 0.16 | 0.16 | 0.17 | 0.21 | 0.17 | 0.25 | 0.21 | 0.16 |
| Total | 1.00 | 1.00 | 1.00 | 1.00 | 1.00 | 1.00 | 1.00 | 1.00 | 1.00 | 1.00 | 1.00 | 1.00 | 1.00 | 1.00 |

**Table A.4** Consistency ratio calculation

| **Criteria** | **Average** | **All priorities matrix** | |  | **Consistency index** | **Random Index** | **Consistency ratio** |
| --- | --- | --- | --- | --- | --- | --- | --- |
| C1 | 0.11 | 1.72 | 15.99 | 15.84 | 0.14 | 1.57 | 0.09<0.1 |
| C2 | 0.10 | 1.60 | 15.84 |
| C3 | 0.02 | 0.32 | 15.11 |
| C4 | 0.01 | 0.21 | 15.45 |
| C5 | 0.02 | 0.28 | 15.15 |
| C6 | 0.06 | 0.90 | 15.83 |
| C7 | 0.04 | 0.60 | 15.87 |
| C8 | 0.04 | 0.65 | 15.83 |
| C9 | 0.04 | 0.68 | 15.87 |
| C10 | 0.06 | 0.92 | 15.77 |
| C11 | 0.17 | 2.72 | 16.31 |
| C12 | 0.10 | 1.60 | 16.54 |
| C13 | 0.07 | 1.19 | 15.89 |
| C14 | 0.16 | 2.64 | 16.33 |

**Table A.5** Beginning decision matrix of the TOPSIS method for cypermethrin removal

|  | Evaluation Criteria | | | | | | | | | | | | | |
| --- | --- | --- | --- | --- | --- | --- | --- | --- | --- | --- | --- | --- | --- | --- |
| **C1** | **C2** | **C3** | **C4** | **C5** | **C6** | **C7** | **C8** | **C9** | **C10** | **C11** | **C12** | **C13** | **C14** | |
| Criteria weights () | 0.11 | 0.10 | 0.02 | 0.01 | 0.02 | 0.06 | 0.04 | 0.04 | 0.04 | 0.06 | 0.17 | 0.10 | 0.07 | 0.16 | |
| A1 | 7 | 3 | 3 | 3 | 3 | 4 | 3 | 4 | 4 | 5 | 3 | 3 | 4 | 4 | |
| A2 | 4 | 2 | 2 | 2 | 2 | 2 | 2 | 3 | 3 | 4 | 2 | 1 | 3 | 3 | |
| A3 | 7 | 2 | 2 | 2 | 2 | 2 | 2 | 3 | 3 | 4 | 2 | 1 | 3 | 3 | |
| Sum of squares | 103 | 20 | 17 | 17 | 17 | 23 | 17 | 34 | 34 | 50 | 17 | 11 | 30 | 30 | |
| Square root of values | 10.16 | 4.46 | 4.12 | 4.12 | 4.12 | 4.81 | 4.12 | 5.83 | 5.83 | 7.04 | 4.12 | 3.27 | 5.50 | 5.50 | |

**Table A.6** Beginning decision matrix of the TOPSIS method for diuron removal

|  | Evaluation Criteria | | | | | | | | | | | | | |
| --- | --- | --- | --- | --- | --- | --- | --- | --- | --- | --- | --- | --- | --- | --- |
| **C1** | **C2** | **C3** | **C4** | **C5** | **C6** | **C7** | **C8** | **C9** | **C10** | **C11** | **C12** | **C13** | **C14** |
| Criteria weights () | 0.11 | 0.10 | 0.02 | 0.01 | 0.02 | 0.06 | 0.04 | 0.04 | 0.04 | 0.06 | 0.17 | 0.10 | 0.07 | 0.16 |
| A4 | 5 | 3 | 4 | 2 | 4 | 4 | 2 | 5 | 2 | 4 | 2 | 3 | 5 | 3 |
| A5 | 8 | 3 | 2 | 2 | 2 | 3 | 2 | 4 | 4 | 4 | 2 | 2 | 3 | 3 |
| A6 | 8 | 4 | 2 | 2 | 4 | 3 | 4 | 4 | 2 | 3 | 4 | 2 | 5 | 4 |
| A7 | 8 | 3 | 2 | 2 | 2 | 3 | 1 | 4 | 2 | 4 | 2 | 3 | 3 | 3 |
| A8 | 8 | 1 | 1 | 1 | 2 | 3 | 1 | 4 | 2 | 4 | 2 | 3 | 3 | 3 |
| A9 | 8 | 1 | 1 | 1 | 2 | 3 | 1 | 4 | 2 | 3 | 2 | 3 | 3 | 3 |
| Sum of squares | 327 | 45 | 33 | 26 | 49 | 57 | 29 | 90 | 42 | 86 | 42 | 46 | 87 | 67 |
| Square root of values | 18.09 | 6.71 | 5.75 | 5.09 | 7.00 | 7.54 | 5.37 | 9.48 | 6.46 | 9.29 | 6.46 | 6.79 | 9.33 | 8.20 |

**Table A.7** TOPSIS method standard (normalized) decision matrix for cypermethrin

|  | **C1** | **C2** | **C3** | **C4** | **C5** | **C6** | **C7** | **C8** | **C9** | **C10** | **C11** | **C12** | **C13** | **C14** |
| --- | --- | --- | --- | --- | --- | --- | --- | --- | --- | --- | --- | --- | --- | --- |
| A1 | 0.640 | 0.673 | 0.728 | 0.728 | 0.728 | 0.728 | 0.728 | 0.686 | 0.686 | 0.711 | 0.728 | 0.816 | 0.728 | 0.728 |
| A2 | 0.426 | 0.523 | 0.485 | 0.485 | 0.485 | 0.485 | 0.485 | 0.514 | 0.514 | 0.497 | 0.485 | 0.408 | 0.485 | 0.485 |
| A3 | 0.640 | 0.523 | 0.485 | 0.485 | 0.485 | 0.485 | 0.485 | 0.514 | 0.514 | 0.497 | 0.485 | 0.408 | 0.485 | 0.485 |

**Table A.8** TOPSIS method weighted standard decision matrix for cypermethrin

|  | **C1** | **C2** | **C3** | **C4** | **C5** | **C6** | **C7** | **C8** | **C9** | **C10** | **C11** | **C12** | **C13** | **C14** |
| --- | --- | --- | --- | --- | --- | --- | --- | --- | --- | --- | --- | --- | --- | --- |
| A1 | 0.069 | 0.068 | 0.016 | 0.010 | 0.013 | 0.041 | 0.028 | 0.028 | 0.030 | 0.041 | 0.122 | 0.079 | 0.054 | 0.118 |
| A2 | 0.046 | 0.053 | 0.010 | 0.007 | 0.009 | 0.028 | 0.018 | 0.021 | 0.022 | 0.029 | 0.081 | 0.040 | 0.036 | 0.078 |
| A3 | 0.069 | 0.053 | 0.010 | 0.007 | 0.009 | 0.028 | 0.018 | 0.021 | 0.022 | 0.029 | 0.081 | 0.040 | 0.036 | 0.078 |

**Table A.9** TOPSIS method calculation of positive and negative discrimination measures for cypermethrin

|  | **C1** | **C2** | **C3** | **C4** | **C5** | **C6** | **C7** | **C8** | **C9** | **C10** | **C11** | **C12** | **C13** | **C14** |
| --- | --- | --- | --- | --- | --- | --- | --- | --- | --- | --- | --- | --- | --- | --- |
| A* | 0.069 | 0.068 | 0.016 | 0.010 | 0.013 | 0.041 | 0.028 | 0.028 | 0.030 | 0.041 | 0.122 | 0.079 | 0.054 | 0.118 |
| A- | 0.046 | 0.053 | 0.010 | 0.007 | 0.009 | 0.028 | 0.018 | 0.021 | 0.022 | 0.029 | 0.081 | 0.040 | 0.036 | 0.078 |

**Table A.10** TOPSIS method measures of positive ideal discrimination for cypermethrin

|  | **C1** | **C2** | **C3** | **C4** | **C5** | **C6** | **C7** | **C8** | **C9** | **C10** | **C11** | **C12** | **C13** | **C14** |
| --- | --- | --- | --- | --- | --- | --- | --- | --- | --- | --- | --- | --- | --- | --- |
| A1 | 0.000 | 0.000 | 0.000 | 0.000 | 0.000 | 0.000 | 0.000 | 0.000 | 0.000 | 0.000 | 0.000 | 0.000 | 0.000 | 0.000 |
| A2 | 0.053 | 0.023 | 0.003 | 0.001 | 0.002 | 0.019 | 0.009 | 0.005 | 0.005 | 0.015 | 0.164 | 0.157 | 0.033 | 0.154 |
| A3 | 0.000 | 0.023 | 0.003 | 0.001 | 0.002 | 0.019 | 0.009 | 0.005 | 0.005 | 0.015 | 0.164 | 0.157 | 0.033 | 0.154 |

**Table A.11** TOPSIS method negative ideal discrimination measures for cypermethrin

|  | **C1** | **C2** | **C3** | **C4** | **C5** | **C6** | **C7** | **C8** | **C9** | **C10** | **C11** | **C12** | **C13** | **C14** |
| --- | --- | --- | --- | --- | --- | --- | --- | --- | --- | --- | --- | --- | --- | --- |
| A1 | 0.053 | 0.023 | 0.003 | 0.001 | 0.002 | 0.019 | 0.009 | 0.005 | 0.005 | 0.015 | 0.164 | 0.157 | 0.033 | 0.154 |
| A2 | 0.000 | 0.000 | 0.000 | 0.000 | 0.000 | 0.000 | 0.000 | 0.000 | 0.000 | 0.000 | 0.000 | 0.000 | 0.000 | 0.000 |
| A3 | 0.053 | 0.000 | 0.000 | 0.000 | 0.000 | 0.000 | 0.000 | 0.000 | 0.000 | 0.000 | 0.000 | 0.000 | 0.000 | 0.000 |

**Table A.12** TOPSIS method discrimination criteria and ranking for cypermethrin

|  |  |  |  |  |  | Ranking |
| --- | --- | --- | --- | --- | --- | --- |
|  | 0.000 |  | 0.801 |  | 1.000 | A1-1 |
|  | 0.801 |  | 0.000 |  | 0.000 | A2-3 |
|  | 0.768 |  | 0.229 |  | 0.230 | A3-2 |

**Table A.13** TOPSIS method standard (normalized) decision matrix for diuron

|  | **C1** | **C2** | **C3** | **C4** | **C5** | **C6** | **C7** | **C8** | **C9** | **C10** | **C11** | **C12** | **C13** | **C14** |
| --- | --- | --- | --- | --- | --- | --- | --- | --- | --- | --- | --- | --- | --- | --- |
| A4 | 0.265 | 0.417 | 0.626 | 0.471 | 0.514 | 0.557 | 0.447 | 0.528 | 0.371 | 0.452 | 0.371 | 0.471 | 0.514 | 0.390 |
| A5 | 0.431 | 0.417 | 0.417 | 0.471 | 0.343 | 0.371 | 0.447 | 0.380 | 0.557 | 0.452 | 0.371 | 0.236 | 0.343 | 0.390 |
| A6 | 0.431 | 0.626 | 0.417 | 0.471 | 0.514 | 0.371 | 0.671 | 0.380 | 0.371 | 0.302 | 0.557 | 0.236 | 0.514 | 0.488 |
| A7 | 0.431 | 0.417 | 0.417 | 0.471 | 0.343 | 0.371 | 0.224 | 0.380 | 0.371 | 0.452 | 0.371 | 0.471 | 0.343 | 0.390 |
| A8 | 0.431 | 0.209 | 0.209 | 0.236 | 0.343 | 0.371 | 0.224 | 0.380 | 0.371 | 0.452 | 0.371 | 0.471 | 0.343 | 0.390 |
| A9 | 0.431 | 0.209 | 0.209 | 0.236 | 0.343 | 0.371 | 0.224 | 0.380 | 0.371 | 0.302 | 0.371 | 0.471 | 0.343 | 0.390 |

**Table A.14** TOPSIS method weighted standard decision matrix for diuron

|  | **C1** | **C2** | **C3** | **C4** | **C5** | **C6** | **C7** | **C8** | **C9** | **C10** | **C11** | **C12** | **C13** | **C14** |
| --- | --- | --- | --- | --- | --- | --- | --- | --- | --- | --- | --- | --- | --- | --- |
| A4 | 0.029 | 0.042 | 0.013 | 0.007 | 0.009 | 0.032 | 0.017 | 0.022 | 0.016 | 0.026 | 0.062 | 0.046 | 0.038 | 0.063 |
| A5 | 0.046 | 0.042 | 0.009 | 0.007 | 0.006 | 0.021 | 0.017 | 0.016 | 0.024 | 0.026 | 0.062 | 0.023 | 0.026 | 0.063 |
| A6 | 0.046 | 0.063 | 0.009 | 0.007 | 0.009 | 0.021 | 0.026 | 0.016 | 0.016 | 0.018 | 0.093 | 0.023 | 0.038 | 0.079 |
| A7 | 0.046 | 0.042 | 0.009 | 0.007 | 0.006 | 0.021 | 0.009 | 0.016 | 0.016 | 0.026 | 0.062 | 0.046 | 0.026 | 0.063 |
| A8 | 0.046 | 0.021 | 0.004 | 0.003 | 0.006 | 0.021 | 0.009 | 0.016 | 0.016 | 0.026 | 0.062 | 0.046 | 0.026 | 0.063 |
| A9 | 0.046 | 0.021 | 0.004 | 0.003 | 0.006 | 0.021 | 0.009 | 0.016 | 0.016 | 0.018 | 0.062 | 0.046 | 0.026 | 0.063 |

**Table A.15** TOPSIS method ideal and negative ideal solution set for diuron

|  | **C1** | **C2** | **C3** | **C4** | **C5** | **C6** | **C7** | **C8** | **C9** | **C10** | **C11** | **C12** | **C13** | **C14** |
| --- | --- | --- | --- | --- | --- | --- | --- | --- | --- | --- | --- | --- | --- | --- |
|  | 0.046 | 0.063 | 0.013 | 0.007 | 0.009 | 0.032 | 0.026 | 0.022 | 0.024 | 0.026 | 0.093 | 0.046 | 0.038 | 0.079 |
|  | 0.029 | 0.021 | 0.004 | 0.003 | 0.006 | 0.021 | 0.009 | 0.016 | 0.016 | 0.018 | 0.062 | 0.023 | 0.026 | 0.063 |

**Table A.16** TOPSIS method positive ideal discrimination measures for diuron

|  | **C1** | **C2** | **C3** | **C4** | **C5** | **C6** | **C7** | **C8** | **C9** | **C10** | **C11** | **C12** | **C13** | **C14** |
| --- | --- | --- | --- | --- | --- | --- | --- | --- | --- | --- | --- | --- | --- | --- |
| A4 | 0.032 | 0.044 | 0.000 | 0.000 | 0.000 | 0.000 | 0.007 | 0.000 | 0.006 | 0.000 | 0.096 | 0.000 | 0.000 | 0.025 |
| A5 | 0.000 | 0.044 | 0.002 | 0.000 | 0.001 | 0.011 | 0.007 | 0.004 | 0.000 | 0.000 | 0.096 | 0.052 | 0.016 | 0.025 |
| A6 | 0.000 | 0.000 | 0.002 | 0.000 | 0.000 | 0.011 | 0.000 | 0.004 | 0.006 | 0.008 | 0.000 | 0.052 | 0.000 | 0.000 |
| A7 | 0.000 | 0.044 | 0.002 | 0.000 | 0.001 | 0.011 | 0.029 | 0.004 | 0.006 | 0.000 | 0.096 | 0.000 | 0.016 | 0.025 |
| A8 | 0.000 | 0.176 | 0.008 | 0.001 | 0.001 | 0.011 | 0.029 | 0.004 | 0.006 | 0.000 | 0.096 | 0.000 | 0.016 | 0.025 |
| A9 | 0.000 | 0.176 | 0.008 | 0.001 | 0.001 | 0.011 | 0.029 | 0.004 | 0.006 | 0.008 | 0.096 | 0.000 | 0.016 | 0.025 |

**Table A.17** TOPSIS method negative ideal discrimination measures for diuron

|  | **C1** | **C2** | **C3** | **C4** | **C5** | **C6** | **C7** | **C8** | **C9** | **C10** | **C11** | **C12** | **C13** | **C14** |
| --- | --- | --- | --- | --- | --- | --- | --- | --- | --- | --- | --- | --- | --- | --- |
| A4 | 0.000 | 0.044 | 0.008 | 0.001 | 0.001 | 0.011 | 0.007 | 0.004 | 0.000 | 0.008 | 0.000 | 0.052 | 0.016 | 0.000 |
| A5 | 0.032 | 0.044 | 0.002 | 0.001 | 0.000 | 0.000 | 0.007 | 0.000 | 0.006 | 0.008 | 0.000 | 0.000 | 0.000 | 0.000 |
| A6 | 0.032 | 0.176 | 0.002 | 0.001 | 0.001 | 0.000 | 0.029 | 0.000 | 0.000 | 0.000 | 0.096 | 0.000 | 0.016 | 0.025 |
| A7 | 0.032 | 0.044 | 0.002 | 0.001 | 0.000 | 0.000 | 0.000 | 0.000 | 0.000 | 0.008 | 0.000 | 0.052 | 0.000 | 0.000 |
| A8 | 0.032 | 0.000 | 0.000 | 0.000 | 0.000 | 0.000 | 0.000 | 0.000 | 0.000 | 0.008 | 0.000 | 0.052 | 0.000 | 0.000 |
| A9 | 0.032 | 0.000 | 0.000 | 0.000 | 0.000 | 0.000 | 0.000 | 0.000 | 0.000 | 0.000 | 0.000 | 0.052 | 0.000 | 0.000 |

**Table A.18** TOPSIS method discrimination criteria and ranking for diuron

|  |  |  |  |  |  | Ranking |
| --- | --- | --- | --- | --- | --- | --- |
|  | 0.459 |  | 0.391 |  | 0.460 | A4-2 |
|  | 0.509 |  | 0.317 |  | 0.384 | A5-4 |
|  | 0.289 |  | 0.615 |  | 0.681 | A6-1 |
|  | 0.485 |  | 0.373 |  | 0.435 | A7-3 |
|  | 0.612 |  | 0.303 |  | 0.331 | A8-5 |
|  | 0.618 |  | 0.290 |  | 0.319 | A9-6 |

**Table A.19** Beginning decision matrix of the VIKOR method for cypermethrin removal

|  | Evaluation Criteria | | | | | | | | | | | | | |
| --- | --- | --- | --- | --- | --- | --- | --- | --- | --- | --- | --- | --- | --- | --- |
| C1 | C2 | C3 | C4 | C5 | C6 | C7 | C8 | C9 | C10 | C11 | C12 | C13 | C14 |
| Criteria weights () | 0.11 | 0.10 | 0.02 | 0.01 | 0.02 | 0.06 | 0.04 | 0.04 | 0.04 | 0.06 | 0.17 | 0.10 | 0.07 | 0.16 |
| A1 | 7 | 3 | 3 | 3 | 3 | 4 | 3 | 4 | 4 | 5 | 3 | 3 | 4 | 4 |
| A2 | 4 | 2 | 2 | 2 | 2 | 2 | 2 | 3 | 3 | 4 | 2 | 1 | 3 | 3 |
| A3 | 7 | 2 | 2 | 2 | 2 | 2 | 2 | 3 | 3 | 4 | 2 | 1 | 3 | 3 |
| Sum of squares | 103 | 20 | 17 | 17 | 17 | 23 | 17 | 34 | 34 | 50 | 17 | 11 | 30 | 30 |
| Square root of values | 10.16 | 4.46 | 4.12 | 4.12 | 4.12 | 4.81 | 4.12 | 5.83 | 5.83 | 7.04 | 4.12 | 3.27 | 5.50 | 5.50 |

**Table A.20** VIKOR method best and worst values for cypermethrin

|  | **C1** | **C2** | **C3** | **C4** | **C5** | **C6** | **C7** | **C8** | **C9** | **C10** | **C11** | **C12** | **C13** | **C14** |
| --- | --- | --- | --- | --- | --- | --- | --- | --- | --- | --- | --- | --- | --- | --- |
|  | 7 | 3 | 3 | 3 | 3 | 4 | 3 | 4 | 4 | 5 | 3 | 3 | 4 | 4 |
|  | 4 | 2 | 2 | 2 | 2 | 2 | 2 | 3 | 3 | 4 | 2 | 1 | 3 | 3 |

**Table A.21** VIKOR method normalized decision matrix for cypermethrin

|  | **C1** | **C2** | **C3** | **C4** | **C5** | **C6** | **C7** | **C8** | **C9** | **C10** | **C11** | **C12** | **C13** | **C14** |
| --- | --- | --- | --- | --- | --- | --- | --- | --- | --- | --- | --- | --- | --- | --- |
| A1 | 0.000 | 0.000 | 0.000 | 0.000 | 0.000 | 0.000 | 0.000 | 0.000 | 0.000 | 0.000 | 0.000 | 0.000 | 0.000 | 0.000 |
| A2 | 1.000 | 1.000 | 1.000 | 1.000 | 1.000 | 1.000 | 1.000 | 1.000 | 1.000 | 1.000 | 1.000 | 1.000 | 1.000 | 1.000 |
| A3 | 0.000 | 1.000 | 1.000 | 1.000 | 1.000 | 1.000 | 1.000 | 1.000 | 1.000 | 1.000 | 1.000 | 1.000 | 1.000 | 1.000 |

**Table A.22** VIKOR method weighted standard decision matrix for cypermethrin

|  | **C1** | **C2** | **C3** | **C4** | **C5** | **C6** | **C7** | **C8** | **C9** | **C10** | **C11** | **C12** | **C13** | **C14** |
| --- | --- | --- | --- | --- | --- | --- | --- | --- | --- | --- | --- | --- | --- | --- |
| A1 | 0.000 | 0.000 | 0.000 | 0.000 | 0.000 | 0.000 | 0.000 | 0.000 | 0.000 | 0.000 | 0.000 | 0.000 | 0.000 | 0.000 |
| A2 | 0.108 | 0.101 | 0.021 | 0.014 | 0.018 | 0.057 | 0.038 | 0.041 | 0.043 | 0.058 | 0.167 | 0.097 | 0.075 | 0.162 |
| A3 | 0.000 | 0.101 | 0.021 | 0.014 | 0.018 | 0.057 | 0.038 | 0.041 | 0.043 | 0.058 | 0.167 | 0.097 | 0.075 | 0.162 |

**Table A.23** VIKOR method S, R and Q values for cypermethrin

|  |  |  |  | , v=0,1 | , v=0,5 | , v=1 | Rank |
| --- | --- | --- | --- | --- | --- | --- | --- |
| 0.000 | 0.000 |  | 0.000 | 0.000 | 0.000 | 0.000 | A1-1 |
| 1.000 | 0.167 |  | 1.000 | 1.000 | 1.000 | 1.000 | A2-3 |
| 0.892 | 0.167 |  | 0.000 | 0.989 | 0.946 | 0.892 | A3-2 |
|  |  |  | 0.167 |  |  |  |  |
|  |  | v | 0.1 |  |  |  |  |
|  |  | v | 0.5 |  |  |  |  |
|  |  | v | 1 |  |  |  |  |

**Table A.24** VIKOR method best and worst values for diuron

|  | **C1** | **C2** | **C3** | **C4** | **C5** | **C6** | **C7** | **C8** | **C9** | **C10** | **C11** | **C12** | **C13** | **C14** |
| --- | --- | --- | --- | --- | --- | --- | --- | --- | --- | --- | --- | --- | --- | --- |
|  | 8 | 4 | 4 | 2 | 4 | 4 | 4 | 5 | 4 | 4 | 4 | 3 | 5 | 4 |
|  | 5 | 1 | 1 | 1 | 2 | 3 | 1 | 4 | 2 | 3 | 2 | 2 | 3 | 3 |

**Table A.25** VIKOR method normalized decision matrix for diuron

|  | **C1** | **C2** | **C3** | **C4** | **C5** | **C6** | **C7** | **C8** | **C9** | **C10** | **C11** | **C12** | **C13** | **C14** |
| --- | --- | --- | --- | --- | --- | --- | --- | --- | --- | --- | --- | --- | --- | --- |
| A4 | 1.000 | 0.500 | 0.000 | 0.000 | 0.000 | 0.000 | 0.500 | 0.000 | 1.000 | 0.000 | 1.000 | 0.000 | 0.000 | 1.000 |
| A5 | 0.000 | 0.500 | 0.500 | 0.000 | 1.000 | 1.000 | 0.500 | 1.000 | 0.000 | 0.000 | 1.000 | 1.000 | 1.000 | 1.000 |
| A6 | 0.000 | 0.000 | 0.500 | 0.000 | 0.000 | 1.000 | 0.000 | 1.000 | 1.000 | 1.000 | 0.000 | 1.000 | 0.000 | 0.000 |
| A7 | 0.000 | 0.500 | 0.500 | 0.000 | 1.000 | 1.000 | 1.000 | 1.000 | 1.000 | 0.000 | 1.000 | 0.000 | 1.000 | 1.000 |
| A8 | 0.000 | 1.000 | 1.000 | 1.000 | 1.000 | 1.000 | 1.000 | 1.000 | 1.000 | 0.000 | 1.000 | 0.000 | 1.000 | 1.000 |
| A9 | 0.000 | 1.000 | 1.000 | 1.000 | 1.000 | 1.000 | 1.000 | 1.000 | 1.000 | 1.000 | 1.000 | 0.000 | 1.000 | 1.000 |

**Table A.26** VIKOR method weighted standard decision matrix for diuron

|  | **C1** | **C2** | **C3** | **C4** | **C5** | **C6** | **C7** | **C8** | **C9** | **C10** | **C11** | **C12** | **C13** | **C14** |
| --- | --- | --- | --- | --- | --- | --- | --- | --- | --- | --- | --- | --- | --- | --- |
| A4 | 0.108 | 0.050 | 0.000 | 0.000 | 0.000 | 0.000 | 0.019 | 0.000 | 0.043 | 0.000 | 0.167 | 0.000 | 0.000 | 0.162 |
| A5 | 0.000 | 0.050 | 0.011 | 0.000 | 0.018 | 0.057 | 0.019 | 0.041 | 0.000 | 0.000 | 0.167 | 0.097 | 0.075 | 0.162 |
| A6 | 0.000 | 0.000 | 0.011 | 0.000 | 0.000 | 0.057 | 0.000 | 0.041 | 0.043 | 0.058 | 0.000 | 0.097 | 0.000 | 0.000 |
| A7 | 0.000 | 0.050 | 0.011 | 0.000 | 0.018 | 0.057 | 0.038 | 0.041 | 0.043 | 0.000 | 0.167 | 0.000 | 0.075 | 0.162 |
| A8 | 0.000 | 0.101 | 0.021 | 0.014 | 0.018 | 0.057 | 0.038 | 0.041 | 0.043 | 0.000 | 0.167 | 0.000 | 0.075 | 0.162 |
| A9 | 0.000 | 0.101 | 0.021 | 0.014 | 0.018 | 0.057 | 0.038 | 0.041 | 0.043 | 0.058 | 0.167 | 0.000 | 0.075 | 0.162 |

**Table A.27** VIKOR method S, R and Q values for diuron

|  |  |  |  | , v=0,1 | , v=0,5 | , v=1 | Rank |
| --- | --- | --- | --- | --- | --- | --- | --- |
| 0.549 | 0.167 |  | 0.307 | 0.949 | 0.747 | 0.495 | A4-2 |
| 0.697 | 0.167 |  | 0.795 | 0.980 | 0.899 | 0.799 | A5-4 |
| 0.307 | 0.097 |  | 0.097 | 0.000 | 0.000 | 0.000 | A6-1 |
| 0.662 | 0.167 |  | 0.167 | 0.973 | 0.864 | 0.727 | A7-3 |
| 0.737 | 0.167 | v | 0.1 | 0.988 | 0.940 | 0.881 | A7-5 |
| 0.795 | 0.167 | v | 0.5 | 1.000 | 1.000 | 1.000 | A8-6 |
|  |  | v | 1 |  |  |  |  |

**Table A.28** Comparison of TOPSIS and VIKOR methods results and final priority ranking

|  | **Treatment Process Alternatives** | **TOPSIS** | **VIKOR** | **Final Priority Ranking** |
| --- | --- | --- | --- | --- |
| Cypermethrin | (A1) GAC | 1 | 1 | 1 |
| (A2) UV-TiO2 | 3 | 3 | 3 |
| (A3) O3/UV/TiO2 or UV/TiO2/H2O2 | 2 | 2 | 2 |
| Diuron | (A4) PAC | 2 | 2 | 2 |
| (A5) Fenton or Photo-Fenton | 4 | 4 | 4 |
| (A6) NF | 1 | 1 | 1 |
| (A7) O3/PAC | 3 | 3 | 3 |
| (A8) Cl2/PAC/Coagulation | 5 | 5 | 5 |
| (A9) O3/PAC/Coagulation | 6 | 6 | 6 |
