# Supplementary material for: Hybrid Multi-Criteria Decision-Making Approach to Choose the Best Treatment Process to Remove Pesticides from Drinking Water Sources: Diuron and Cypermethrin
Source: Research Square preprint supplement (doi:10.21203/rs.3.rs-1886636/v1), 2023-03-28
Supplement: Supplementary file 2 [file 9f84e01d124be07015b0ca3b.docx]

Table 1. Physicochemical properties of the selected pesticides.

| Micro-Pollutant (MP) Name | Diuron | Cypermethrin |
| --- | --- | --- |
| MP Sub-Category | Herbicide | Insecticide |
| CAS Number | 330-54-1 | 52315-07-8 |
| Chemical Formula | C9H10Cl2N2O | C22H19Cl2NO3 |
| Molecular Weight (g/mole) | 233.09 | 416.30 |
| Boiling Point (°C) | 355 – 357 | NA* |
| Density (g/cm³) | 1.45 | 1.25 |
| log Kow | 2.84 | 4.8 – 6.6 |
| Water Solubility (g/L) (20-25 °C) | 0.029 | Insoluble |

*NA: Not Available

Table 2. RI values for matrices

| N | 1 | 2 | 3 | 4 | 5 | 6 | 7 | 8 | 9 | 10 | 11 | 12 | 13 | 14 | 15 |
| --- | --- | --- | --- | --- | --- | --- | --- | --- | --- | --- | --- | --- | --- | --- | --- |
| RI | 0 | 0 | 0.58 | 0.90 | 1.12 | 1.24 | 1.32 | 1.41 | 1.45 | 1.49 | 1.51 | 1.53 | 1.56 | 1.57 | 1.59 |

Table 3. Consistency ratio calculation

| Criteria | Average | All priorities matrix | |  | Consistency index | Random Index | Consistency ratio |
| --- | --- | --- | --- | --- | --- | --- | --- |
| C1 | 0.11 | 1.72 | 15.99 | 15.84 | 0.14 | 1.57 | 0.09<0.1 |
| C2 | 0.10 | 1.60 | 15.84 |
| C3 | 0.02 | 0.32 | 15.11 |
| C4 | 0.01 | 0.21 | 15.45 |
| C5 | 0.02 | 0.28 | 15.15 |
| C6 | 0.06 | 0.90 | 15.83 |
| C7 | 0.04 | 0.60 | 15.87 |
| C8 | 0.04 | 0.65 | 15.83 |
| C9 | 0.04 | 0.68 | 15.87 |
| C10 | 0.06 | 0.92 | 15.77 |
| C11 | 0.17 | 2.72 | 16.31 |
| C12 | 0.10 | 1.60 | 16.54 |
| C13 | 0.07 | 1.19 | 15.89 |
| C14 | 0.16 | 2.64 | 16.33 |

Table 4. TOPSIS method discrimination criteria and ranking for cypermethrin and Diuron

|  |  |  |  |  |
| --- | --- | --- | --- | --- |
| Cypermethrin | (A1) GAC | 0.000 | 0.801 | 1.000 |
| (A2) UV-TiO2 | 0.801 | 0.000 | 0.000 |
| (A3) O3/UV/TiO2 or UV/TiO2/H2O2 | 0.768 | 0.229 | 0.230 |
| Diuron | (A4) PAC | 0.459 | 0.391 | 0.460 |
| (A5) Fenton or Photo-Fenton | 0.509 | 0.317 | 0.384 |
| (A6) NF | 0.289 | 0.615 | 0.681 |
| (A7) O3/PAC | 0.485 | 0.373 | 0.435 |
| (A8) Cl2/PAC/Coagulation | 0.612 | 0.303 | 0.331 |
| (A9) O3/PAC/Coagulation | 0.618 | 0.290 | 0.319 |

Table 5. VIKOR method , and values for cypermethrin and diuron

|  |  |  |  |  |
| --- | --- | --- | --- | --- |
| Cypermethrin | (A1) GAC | 0.000 | 0.000 | 0.000 |
| (A2) UV-TiO2 | 1.000 | 0.167 | 1.000 |
| (A3) O3/UV/TiO2 or UV/TiO2/H2O2 | 0.892 | 0.167 | 0.892 |
| Diuron | (A4) PAC | 0.549 | 0.167 | 0.495 |
| (A5) Fenton or Photo-Fenton | 0.697 | 0.167 | 0.799 |
| (A6) NF | 0.307 | 0.097 | 0.000 |
| (A7) O3/PAC | 0.662 | 0.167 | 0.727 |
| (A8) Cl2/PAC/Coagulation | 0.737 | 0.167 | 0.881 |
| (A9) O3/PAC/Coagulation | 0.795 | 0.167 | 1.000 |
